# Supplementary material for: Serum microRNAs as new criteria for referral to early palliative care services in treatment-naïve advanced cancer patients
Source: PubMed Central journal article supplement (PMC9760266; doi:10.18632/oncotarget.28327), 2022-12-17
Supplement: oncotarget-13-28327-s001.pdf [file oncotarget-13-28327-s001.pdf]

## Serum microRNAs as new criteria for referral to early palliative care services in treatment-naïve advanced cancer patients

### SUPPLEMENTARY MATERIALS

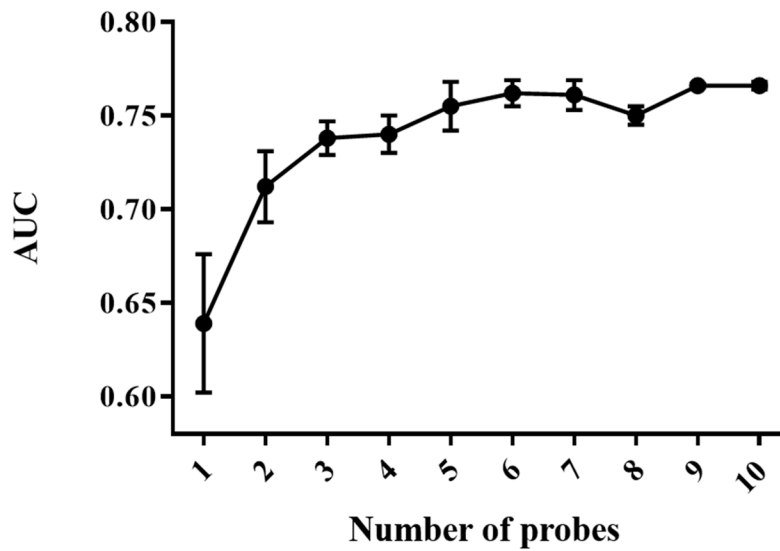

Supplementary Figure 1: Mean AUC of the 10 candidate miRNA models by the number of miR probes.

**Supplementary Table 1: Details of each predictive model**

|               | Predictive models                                                                                                                                                                                                                                                                                                                                                                                                                                                                                                                                                                                           |
|---------------|-------------------------------------------------------------------------------------------------------------------------------------------------------------------------------------------------------------------------------------------------------------------------------------------------------------------------------------------------------------------------------------------------------------------------------------------------------------------------------------------------------------------------------------------------------------------------------------------------------------|
| Clin          | $(-7.819) + (1.819) \times (\text{Alb}) + (7.503 \times 10^{-2}) \times (\text{CRP}) + (2.558 \times 10^{-3}) \times (\text{PS}) + (-1.237 \times 10^{-3}) \times (\text{LDH}) + (2.193 \times 10^{-1}) \times (\text{Hb}) + (-7.428 \times 10^{-5}) \times (\text{Neut})$                                                                                                                                                                                                                                                                                                                                  |
| miR-model-01  | $(-5.799) + (-1.285) \times (\text{miR-642b-3p}) + (-3.785 \times 10^{-1}) \times (\text{miR-6768-5p}) + (-5.585 \times 10^{-2}) \times (\text{miR-4758-5p}) + (-4.436 \times 10^{-1}) \times (\text{miR-6821-5p}) + (1.513) \times (\text{miR-3663-3p}) + (1.074) \times (\text{miR-7107-5p})$                                                                                                                                                                                                                                                                                                             |
| miR-model-02  | $(-8.830) + (1.084 \times 10^{-1}) \times (\text{miR-3648}) + (-1.327) \times (\text{miR-642b-3p}) + (-5.256 \times 10^{-1}) \times (\text{miR-6768-5p}) + (-1.471 \times 10^{-1}) \times (\text{miR-4725-3p}) + (1.553) \times (\text{miR-3663-3p}) + (1.052) \times (\text{miR-7107-5p})$                                                                                                                                                                                                                                                                                                                 |
| miR-model-03  | $(-10.771) + (-2.162 \times 10^{-1}) \times (\text{miR-486-5p}) + (3.866 \times 10^{-1}) \times (\text{miR-7846-3p}) + (-7.765 \times 10^{-1}) \times (\text{miR-642b-3p}) + (4.913 \times 10^{-1}) \times (\text{miR-4707-5p}) + (1.334) \times (\text{miR-3663-3p}) + (-2.264 \times 10^{-1}) \times (\text{miR-4732-5p})$                                                                                                                                                                                                                                                                                |
| miR-model-04  | $(-13.476) + (-8.259 \times 10^{-1}) \times (\text{miR-642b-3p}) + (6.845 \times 10^{-1}) \times (\text{miR-4758-5p}) + (1.235) \times (\text{miR-3663-3p}) + (-1.085 \times 10^{-1}) \times (\text{miR-296-5p}) + (5.114 \times 10^{-1}) \times (\text{miR-4433b-3p}) + (-2.838 \times 10^{-1}) \times (\text{miR-4732-5p})$                                                                                                                                                                                                                                                                               |
| miR-model-05  | $(-13.935) + (-8.494 \times 10^{-1}) \times (\text{miR-642b-3p}) + (7.479 \times 10^{-1}) \times (\text{miR-4758-5p}) + (-2.568 \times 10^{-2}) \times (\text{miR-8071}) + (1.208) \times (\text{miR-3663-3p}) + (4.937 \times 10^{-1}) \times (\text{miR-4433b-3p}) + (-2.830 \times 10^{-1}) \times (\text{miR-4732-5p})$                                                                                                                                                                                                                                                                                 |
| miR-model-06  | $(-8.164) + (2.251 \times 10^{-1}) \times (\text{miR-4745-5p}) + (-1.420) \times (\text{miR-642b-3p}) + (-4.611 \times 10^{-1}) \times (\text{miR-6768-5p}) + (-3.500 \times 10^{-1}) \times (\text{miR-3679-5p}) + (1.436) \times (\text{miR-3663-3p}) + (1.138) \times (\text{miR-7107-5p})$                                                                                                                                                                                                                                                                                                              |
| miR-model-07  | $(-9.950) + (-5.804 \times 10^{-1}) \times (\text{miR-4707-3p}) + (-9.637 \times 10^{-1}) \times (\text{miR-642b-3p}) + (8.340 \times 10^{-1}) \times (\text{miR-6721-5p}) + (-1.185 \times 10^{-1}) \times (\text{miR-8063}) + (1.653) \times (\text{miR-3663-3p}) + (-2.356 \times 10^{-1}) \times (\text{miR-4732-5p})$                                                                                                                                                                                                                                                                                  |
| miR-model-08  | $(-11.861) + (6.020 \times 10^{-3}) \times (\text{miR-6836-3p}) + (-7.761 \times 10^{-1}) \times (\text{miR-642b-3p}) + (7.691 \times 10^{-1}) \times (\text{miR-6721-5p}) + (1.162) \times (\text{miR-3663-3p}) + (1.836 \times 10^{-1}) \times (\text{miR-4497}) + (-3.307 \times 10^{-1}) \times (\text{miR-4732-5p})$                                                                                                                                                                                                                                                                                   |
| miR-model-09  | $(-5.934) + (9.385 \times 10^{-2}) \times (\text{miR-3648}) + (-1.364) \times (\text{miR-642b-3p}) + (-5.530 \times 10^{-1}) \times (\text{miR-6768-5p}) + (-4.922 \times 10^{-1}) \times (\text{miR-6781-5p}) + (1.671) \times (\text{miR-3663-3p}) + (1.084) \times (\text{miR-7107-5p})$                                                                                                                                                                                                                                                                                                                 |
| miR-model-10  | $(-7.986) + (-2.244 \times 10^{-1}) \times (\text{miR-486-5p}) + (4.181 \times 10^{-1}) \times (\text{miR-7846-3p}) + (-6.985 \times 10^{-1}) \times (\text{miR-642b-3p}) + (1.947 \times 10^{-1}) \times (\text{miR-1225-3p}) + (1.265) \times (\text{miR-3663-3p}) + (-2.991 \times 10^{-1}) \times (\text{miR-4732-5p})$                                                                                                                                                                                                                                                                                 |
| Comb-model-01 | $(-12.910) + (-9.820 \times 10^{-1}) \times (\text{miR-642b-3p}) + (-2.892 \times 10^{-1}) \times (\text{miR-6768-5p}) + (-4.268 \times 10^{-2}) \times (\text{miR-4758-5p}) + (-3.390 \times 10^{-1}) \times (\text{miR-6821-5p}) + (1.156) \times (\text{miR-3663-3p}) + (8.208 \times 10^{-1}) \times (\text{miR-7107-5p}) + (1.651) \times (\text{Alb}) + (2.187 \times 10^{-1}) \times (\text{Hb}) + (9.457 \times 10^{-2}) \times (\text{CRP}) + (-1.926 \times 10^{-2}) \times (\text{PS}) + (-9.343 \times 10^{-4}) \times (\text{LDH}) + (-7.859 \times 10^{-5}) \times (\text{Neut})$             |
| Comb-model-02 | $(-15.212) + (8.206 \times 10^{-2}) \times (\text{miR-3648}) + (-1.005) \times (\text{miR-642b-3p}) + (-3.979 \times 10^{-1}) \times (\text{miR-6768-5p}) + (-1.114 \times 10^{-1}) \times (\text{miR-4725-3p}) + (1.176) \times (\text{miR-3663-3p}) + (7.964 \times 10^{-1}) \times (\text{miR-7107-5p}) + (1.650) \times (\text{Alb}) + (9.495 \times 10^{-2}) \times (\text{CRP}) + (-2.241 \times 10^{-2}) \times (\text{PS}) + (-9.356 \times 10^{-4}) \times (\text{LDH}) + (2.233 \times 10^{-1}) \times (\text{Hb}) + (-7.760 \times 10^{-5}) \times (\text{Neut})$                                |
| Comb-model-03 | $(-17.330) + (-1.814 \times 10^{-1}) \times (\text{miR-486-5p}) + (3.245 \times 10^{-1}) \times (\text{miR-7846-3p}) + (-6.517 \times 10^{-1}) \times (\text{miR-642b-3p}) + (4.123 \times 10^{-1}) \times (\text{miR-4707-5p}) + (1.120) \times (\text{miR-3663-3p}) + (-1.900 \times 10^{-1}) \times (\text{miR-4732-5p}) + (1.693) \times (\text{Alb}) + (1.084 \times 10^{-1}) \times (\text{CRP}) + (3.319 \times 10^{-2}) \times (\text{PS}) + (-9.630 \times 10^{-4}) \times (\text{LDH}) + (1.824 \times 10^{-1}) \times (\text{Hb}) + (-8.891 \times 10^{-5}) \times (\text{Neut})$                |
| Comb-model-04 | $(-18.759) + (-6.139 \times 10^{-1}) \times (\text{miR-642b-3p}) + (5.088 \times 10^{-1}) \times (\text{miR-4758-5p}) + (9.179 \times 10^{-1}) \times (\text{miR-3663-3p}) + (-8.064 \times 10^{-2}) \times (\text{miR-296-5p}) + (3.801 \times 10^{-1}) \times (\text{miR-4433b-3p}) + (-2.109 \times 10^{-1}) \times (\text{miR-4732-5p}) + (1.743) \times (\text{Alb}) + (1.063 \times 10^{-1}) \times (\text{CRP}) + (1.160 \times 10^{-2}) \times (\text{PS}) + (9.353 \times 10^{-4}) \times (\text{LDH}) + (2.064 \times 10^{-1}) \times (\text{Hb}) + (-6.957 \times 10^{-5}) \times (\text{Neut})$ |
| Comb-model-05 | $(-24.220) + (-6.313 \times 10^{-1}) \times (\text{miR-642b-3p}) + (5.559 \times 10^{-1}) \times (\text{miR-4758-5p}) + (-1.909 \times 10^{-2}) \times (\text{miR-8071}) + (8.979 \times 10^{-1}) \times (\text{miR-3663-3p}) + (3.669 \times 10^{-1}) \times (\text{miR-4433b-3p}) + (-2.103 \times 10^{-1}) \times (\text{miR-4732-5p}) + (1.730) \times (\text{Alb}) + (1.060 \times 10^{-1}) \times (\text{CRP}) + (-4.400 \times 10^{-5}) \times (\text{PS}) + (-9.433 \times 10^{-4}) \times (\text{LDH}) + (2.077 \times 10^{-1}) \times (\text{Hb}) + (-6.916 \times 10^{-5}) \times (\text{Neut})$ |

|               |                                                                                                                                                                                                                                                                                                                                                                                                                                                                                                                                                                                                             |
|---------------|-------------------------------------------------------------------------------------------------------------------------------------------------------------------------------------------------------------------------------------------------------------------------------------------------------------------------------------------------------------------------------------------------------------------------------------------------------------------------------------------------------------------------------------------------------------------------------------------------------------|
| Comb-model-06 | $(-14.094) + (1.627 \times 10^{-1}) \times (\text{miR-4745-5p}) + (-1.026) \times (\text{miR-642b-3p}) + (-3.333 \times 10^{-1}) \times (\text{miR-6768-5p}) + (-2.530 \times 10^{-1}) \times (\text{miR-3679-5p}) + (1.038) \times (\text{miR-3663-3p}) + (8.225 \times 10^{-1}) \times (\text{miR-7107-5p}) + (1.622) \times (\text{Alb}) + (8.986 \times 10^{-2}) \times (\text{CRP}) + (-4.366 \times 10^{-2}) \times (\text{PS}) + (-8.988 \times 10^{-4}) \times (\text{LDH}) + (2.100) \times (\text{Hb}) + (-7.453 \times 10^{-5}) \times (\text{Neut})$                                            |
| Comb-model-07 | $(-17.935) + (-4.195 \times 10^{-1}) \times (\text{miR-4707-3p}) + (-6.966 \times 10^{-1}) \times (\text{miR-642b-3p}) + (6.028 \times 10^{-1}) \times (\text{miR-6721-5p}) + (-8.565 \times 10^{-2}) \times (\text{miR-8063}) + (1.195) \times (\text{miR-3663-3p}) + (-1.703 \times 10^{-1}) \times (\text{miR-4732-5p}) + (1.745) \times (\text{Alb}) + (1.289 \times 10^{-1}) \times (\text{CRP}) + (4.810 \times 10^{-2}) \times (\text{PS}) + (-1.056 \times 10^{-3}) \times (\text{LDH}) + (2.245 \times 10^{-1}) \times (\text{Hb}) + (-7.009 \times 10^{-5}) \times (\text{Neut})$                 |
| Comb-model-08 | $(-17.598) + (4.531 \times 10^{-3}) \times (\text{miR-6836-3p}) + (-5.610 \times 10^{-1}) \times (\text{miR-642b-3p}) + (5.559 \times 10^{-1}) \times (\text{miR-6721-5p}) + (8.399 \times 10^{-1}) \times (\text{miR-3663-3p}) + (1.327 \times 10^{-1}) \times (\text{miR-4497}) + (-2.390 \times 10^{-1}) \times (\text{miR-4732-5p}) + (1.726) \times (\text{Alb}) + (1.062 \times 10^{-1}) \times (\text{CRP}) + (-1.540 \times 10^{-2}) \times (\text{PS}) + (-9.221 \times 10^{-4}) \times (\text{LDH}) + (2.062 \times 10^{-1}) \times (\text{Hb}) + (-6.923 \times 10^{-5}) \times (\text{Neut})$   |
| Comb-model-09 | $(-13.111) + (6.783 \times 10^{-2}) \times (\text{miR-3648}) + (-9.859 \times 10^{-1}) \times (\text{miR-642b-3p}) + (-3.997 \times 10^{-1}) \times (\text{miR-6768-5p}) + (-3.558 \times 10^{-1}) \times (\text{miR-6781-5p}) + (1.208) \times (\text{miR-3663-3p}) + (7.835 \times 10^{-1}) \times (\text{miR-7107-5p}) + (1.637) \times (\text{Alb}) + (9.488 \times 10^{-2}) \times (\text{CRP}) + (-2.399 \times 10^{-2}) \times (\text{PS}) + (-9.779 \times 10^{-4}) \times (\text{LDH}) + (2.219 \times 10^{-1}) \times (\text{Hb}) + (-7.788 \times 10^{-5}) \times (\text{Neut})$                 |
| Comb-model-10 | $(-14.601) + (-1.622 \times 10^{-1}) \times (\text{miR-486-5p}) + (3.022 \times 10^{-1}) \times (\text{miR-7846-3p}) + (-5.049 \times 10^{-1}) \times (\text{miR-642b-3p}) + (1.407 \times 10^{-1}) \times (\text{miR-1225-3p}) + (9.143 \times 10^{-1}) \times (\text{miR-3663-3p}) + (-2.162 \times 10^{-1}) \times (\text{miR-4732-5p}) + (1.674) \times (\text{Alb}) + (1.000 \times 10^{-1}) \times (\text{CRP}) + (2.374 \times 10^{-2}) \times (\text{PS}) + (-8.658 \times 10^{-4}) \times (\text{LDH}) + (1.847 \times 10^{-1}) \times (\text{Hb}) + (-8.710 \times 10^{-5}) \times (\text{Neut})$ |

---

Abbreviations: Alb: albumin; CRP: C-reactive protein; PS: performance status; Hb: hemoglobin; Neut: neutrophil count.

**Supplementary Table 2: Diagnostic ability of each variable**

|                  | AUC   | Sensitivity | Specificity | PPV   | NPV   |
|------------------|-------|-------------|-------------|-------|-------|
| Alb              | 0.710 | 0.655       | 0.725       | 0.317 | 0.915 |
| CRP              | 0.663 | 0.793       | 0.483       | 0.230 | 0.923 |
| PS               | 0.606 | 0.621       | 0.557       | 0.214 | 0.883 |
| LDH              | 0.664 | 0.724       | 0.597       | 0.259 | 0.918 |
| Hb               | 0.658 | 0.828       | 0.436       | 0.222 | 0.929 |
| Neut             | 0.592 | 0.241       | 0.940       | 0.438 | 0.864 |
| GPS              | 0.646 | 0.551       | 0.678       | 0.250 | 0.886 |
| hsa-miR-4732-5p  | 0.651 | 0.828       | 0.456       | 0.229 | 0.932 |
| hsa-miR-642b-3p  | 0.625 | 0.552       | 0.718       | 0.276 | 0.892 |
| hsa-miR-8063     | 0.616 | 0.448       | 0.805       | 0.310 | 0.882 |
| hsa-miR-6821-5p  | 0.605 | 0.793       | 0.470       | 0.225 | 0.921 |
| hsa-miR-4497     | 0.603 | 0.793       | 0.477       | 0.228 | 0.922 |
| hsa-miR-3663-3p  | 0.595 | 0.379       | 0.852       | 0.333 | 0.876 |
| hsa-miR-4745-5p  | 0.590 | 0.517       | 0.671       | 0.234 | 0.877 |
| hsa-miR-486-5p   | 0.562 | 0.483       | 0.685       | 0.230 | 0.872 |
| hsa-miR-1225-3p  | 0.551 | 0.724       | 0.423       | 0.196 | 0.887 |
| hsa-miR-4707-5p  | 0.550 | 0.862       | 0.295       | 0.192 | 0.917 |
| hsa-miR-7846-3p  | 0.546 | 0.448       | 0.772       | 0.277 | 0.878 |
| hsa-miR-3648     | 0.539 | 0.414       | 0.732       | 0.231 | 0.865 |
| hsa-miR-6768-5p  | 0.537 | 0.483       | 0.638       | 0.206 | 0.864 |
| hsa-miR-4707-3p  | 0.532 | 0.586       | 0.517       | 0.191 | 0.865 |
| hsa-miR-8071     | 0.528 | 0.276       | 0.832       | 0.242 | 0.855 |
| hsa-miR-6781-5p  | 0.525 | 0.759       | 0.356       | 0.186 | 0.883 |
| hsa-miR-4725-3p  | 0.523 | 0.828       | 0.309       | 0.189 | 0.902 |
| hsa-miR-3679-5p  | 0.522 | 0.862       | 0.336       | 0.202 | 0.926 |
| hsa-miR-4758-5p  | 0.517 | 0.828       | 0.289       | 0.185 | 0.896 |
| hsa-miR-296-5p   | 0.517 | 0.621       | 0.510       | 0.198 | 0.874 |
| hsa-miR-6721-5p  | 0.510 | 0.793       | 0.322       | 0.185 | 0.889 |
| hsa-miR-7107-5p  | 0.497 | 0.897       | 0.221       | 0.183 | 0.917 |
| hsa-miR-4433b-3p | 0.496 | 0.552       | 0.530       | 0.186 | 0.859 |
| hsa-miR-6836-3p  | 0.493 | 0.172       | 0.926       | 0.313 | 0.852 |

Abbreviations: Alb: albumin; CRP: C-reactive protein; PS: performance status; Hb: hemoglobin; Neut: neutrophil count; GPS: Glasgow Prognostic Scale; AUC: area under the curve; PPV: positive predictive value; NPV: negative predictive value.
